# Supplementary material for: Targeted Delivery of siRNA to Transferrin Receptor Overexpressing Tumor Cells via Peptide Modified Polyethylenimine
Source: Molecules. 2016 Oct 10;21(10):1334. doi: 10.3390/molecules21101334 (PMC6273023; doi:10.3390/molecules21101334)
Supplement: Supplementary file 1 [file molecules-21-01334-s001.pdf]

# Supplementary Materials: Targeted Delivery of siRNA to Transferrin Receptor Overexpressing Tumor Cells via Peptide Modified Polyethylenimine

Yuran Xie <sup>1</sup>, Bryan Killinger, Anna Moszczynska and Olivia M. Merkel

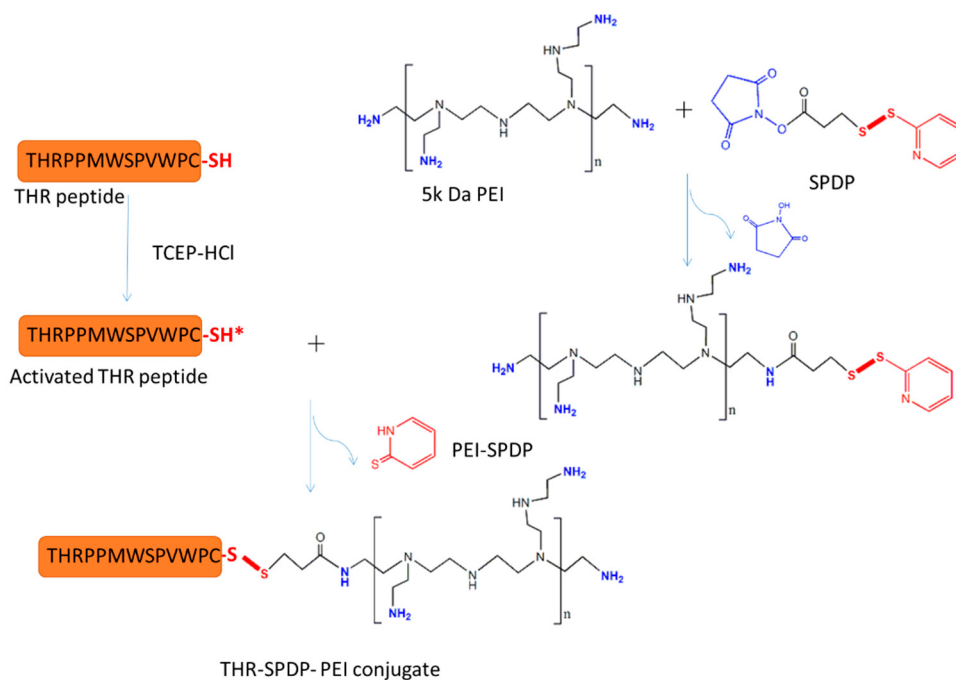

**Figure S1.** Synthesis approach of THR-SPDP-bPEI. 5k bPEI (1 mg/mL) was dissolved in HBS buffer and mixed with 100  $\mu$ L 20 mM of SPDP, stirred overnight, followed by purification via 3000 MWCO centrifugal filters. THRPPMWSPVWP peptide (THR) peptide was reduced by 10-fold excess TCEP (Thermo Fisher) and purified using PD10 column (GE healthcare). THR peptide were mixed with bPEI-SPDP overnight with stirring at RT. The concentration of THR peptide and bPEI in conjugate were measured spectrophotometrically at 280 nm and by a TNBS assay, respectively. (SPDP: succinimidyl 3-(2-pyridyldithio) propionate; TCEP: Tris (2-carboxyethyl) phosphine hydrochloride.)

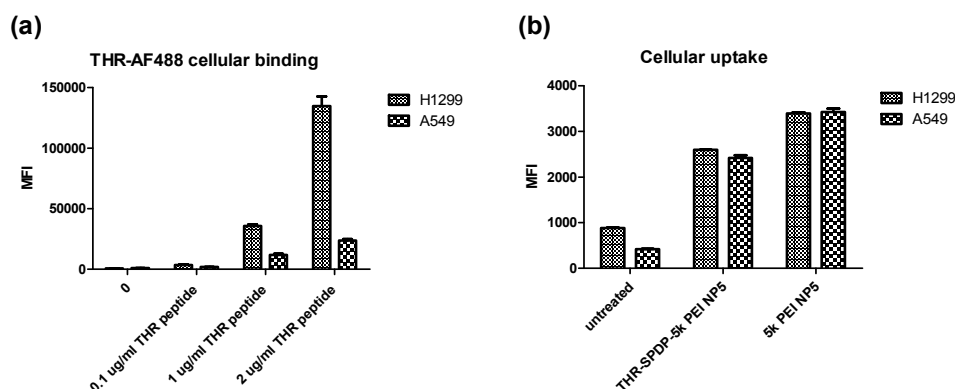

**Figure S2.** (a) Cysteine modified THR peptide were fluorescently labeled by Alexa Fluor 488- maleimide (Thermo Fisher) following the manufacturer's protocol (THR-AF488). Different concentrations of THR-AF488 were incubated with H1299 and A549 for 1 h at 37 °C. The cellular binding of THR-AF488 were quantified by flow cytometry. (Data points indicate mean  $\pm$  SD,  $n = 3$ ) (b) The cellular uptake of bPEI and THR-bPEI polyplexes was determined in H1299 and A549 cells. Polyplexes were prepared with 50 pmol of siRNA-AF488 at N/P = 5 for 24 h. The cellular uptake was quantified by flow cytometry. (Data points indicate mean  $\pm$  SD,  $n = 2-3$ ).

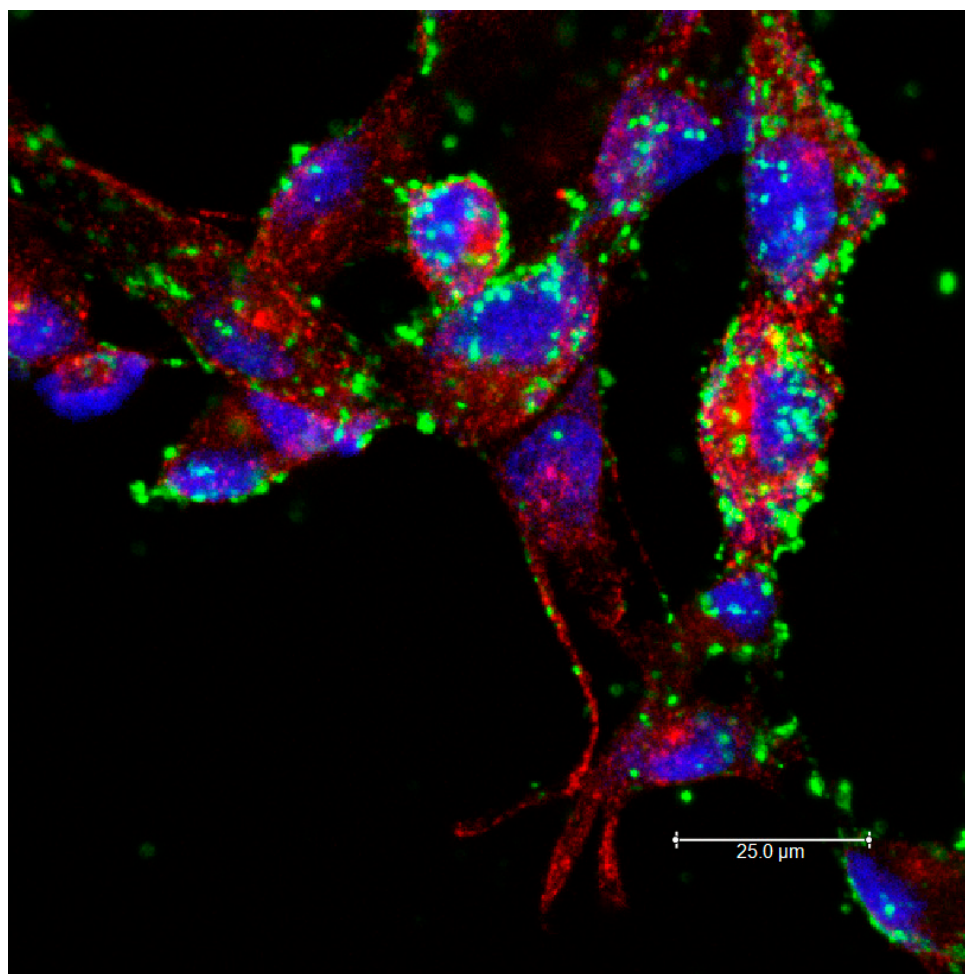

**Figure S3.** 2  $\mu\text{g/mL}$  of THR-AF488 and Tf-Texas Red were incubated with H1299 for 1 h at 37  $^{\circ}\text{C}$ . The cellular distribution of THR-AF488 and Tf-Texas Red was observed under confocal laser scanning microscopy (CLSM).

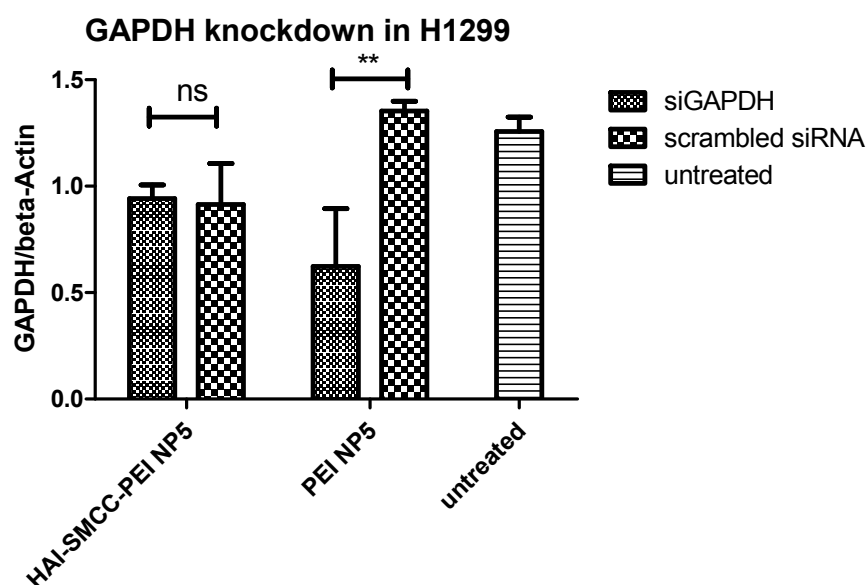

**Figure S4.** H1299 were transfected with bPEI or THR-bPEI polyplexes formulated with 50 pmol of siGAPDH or scrambled siRNA at N/P = 5 for 24 h. The expression of GAPDH was determined by RT-PCR and normalized to the expression of  $\beta$ -actin. (Data points indicate mean  $\pm$  SD,  $n = 3$ , ns,  $p > 0.05$ , \*\*  $p < 0.01$ ).

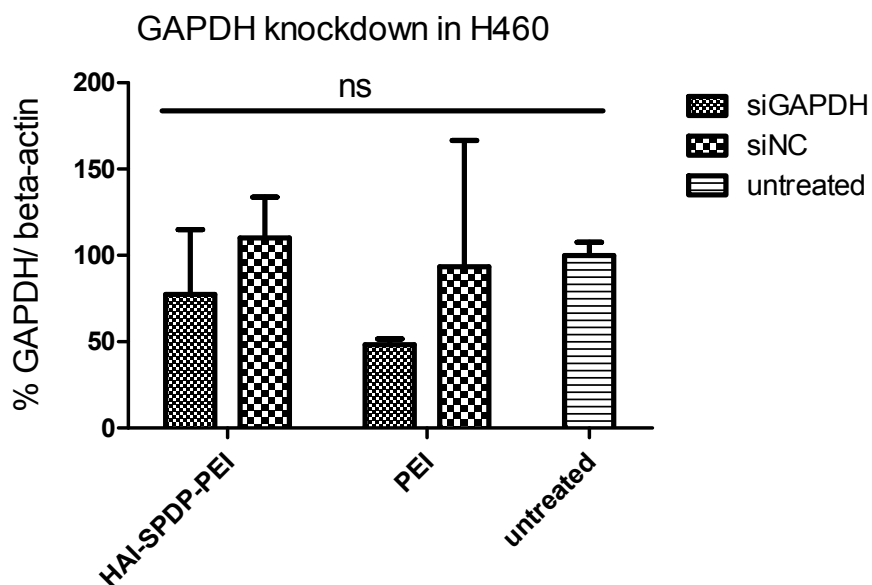

**Figure S5.** H460 cells were transfected with bPEI or HAI-SPDP-bPEI polyplexes. The expression of GAPDH was determined by RT-PCR and normalized to the expression of  $\beta$ -actin. Untreated control represented 100% GAPDH/ $\beta$ -actin. (Data points indicate mean  $\pm$  SD,  $n = 3$ . ns,  $p > 0.05$ ).
